# Supplementary material
Source: HighWire-hosted journal article supplement (https://adc.bmj.com/content/102/5/434)
Supplement: inline-supplementary-material-2 [file inline-supplementary-material-2.pdf]

## Appendix A2: Reasons for presentation

Table A1. Young people's reasons for presentation to general practice by weight category

|                                                | <b>Underweight<br/>N=61</b> | <b>Normal Weight<br/>N= 456</b> | <b>Overweight<br/>N=122</b> | <b>Obese<br/>N=44</b> |
|------------------------------------------------|-----------------------------|---------------------------------|-----------------------------|-----------------------|
| <b>At least one complaint<br/>of ICPC (19)</b> | <b>n(%)</b>                 | <b>n(%)</b>                     | <b>n(%)</b>                 | <b>n(%)</b>           |
| A                                              | 15 (24.6)                   | 93 (20.4)                       | 21 (17.2)                   | 10 (22.7)             |
| B                                              | 0 (0.0)                     | 18 (3.9)                        | 4 (3.3)                     | 0 (0.0)               |
| D                                              | 2 (3.3)                     | 25 (5.5)                        | 8 (6.6)                     | 4 (9.1)               |
| F                                              | 0 (0.0)                     | 8(1.8)                          | 2 (1.6)                     | 1 (2.3)               |
| H                                              | 0 (0.0)                     | 4 (0.9)                         | 2 (1.6)                     | 2 (4.5)               |
| K                                              | 1 (1.6)                     | 6 (1.3)                         | 0 (0.0)                     | 1 (2.3)               |
| L                                              | 3 (4.9)                     | 36 (7.9)                        | 10 (8.2)                    | 3 (6.8)               |
| N                                              | 0 (0.0)                     | 17 (3.7)                        | 3 (2.5)                     | 4 (9.1)               |
| P                                              | 4 (6.6)                     | 30 (6.6)                        | 3 (2.5)                     | 2 (4.5)               |
| R                                              | 9 (14.8)                    | 74 (16.2)                       | 20 (16.4)                   | 8 (18.2)              |
| S                                              | 8 (11.5)                    | 63 (13.8)                       | 11 (9.0)                    | 3 (6.8)               |
| T                                              | 4 (6.6)                     | 9 (2.0)                         | 2 (1.6)                     | 2 (4.5)               |
| U                                              | 3 (4.9)                     | 12 (2.6)                        | 0 (0.0)                     | 1 (2.3)               |
| W                                              | 7 (11.5)                    | 37 (8.1)                        | 9 (7.4)                     | 0 (0.0)               |
| X                                              | 6 (9.8)                     | 38 (8.3)                        | 13 (10.7)                   | 4 (9.1)               |
| Y                                              | 0 (0.0)                     | 4 (0.9)                         | 0 (0.0)                     | 0 (0.0)               |
| Z                                              | 1 (1.6)                     | 3 (0.7)                         | 0 (0.0)                     | 0 (0.0)               |
| <b>Group of complaints</b>                     |                             |                                 |                             |                       |
| Physiological/General                          | 41 (67.2)                   | 321 (70.4)                      | 82 (67.2)                   | 33 (75.0)             |
| Sexual/Reproductive                            | 14 (23.0)                   | 92 (20.2)                       | 21 (17.2)                   | 6 (13.6)              |
| Psychosocial                                   | 6 (9.8)                     | 37 (8.1)                        | 3 (2.5)                     | 2 (4.5)               |

A = General and unspecified

B = Blood, blood-forming organs, and immune mechanism

D = Digestive

F = Eye

H = Ear

K = Circulatory

L = Musculoskeletal

N = Neurological

P = Psychological

R = Respiratory

S = Skin

T = Endocrine, metabolic and nutritional

U = Urinary system

W = Pregnancy, child bearing, family planning

X = Female genital system (including breast)

Y = Male genital system

Z = Social problems
